# Supplementary material for: Randomised, Placebo-Controlled Investigation of the Impact of Probiotic Consumption on Gut Microbiota Diversity and the Faecal Metabolome in Seniors
Source: MDPI journal article supplement (doi:10.3390/microorganisms12040796), 2024-04-15

**Supplementary Table S1.** The most abundant bacterial families in the faecal microbiome of older Danish adults (at baseline), as determined by 16S rRNA gene amplicon sequencing (n = 98). No. of zOTUs; number of zOTUs representing the given taxa. No. of samples; number of samples where the given taxa was observed. No. of samples (%); percentage of samples, where the given taxa was observed.

| Phylum                       | Class                      | Order                     | Family                       | No. of zOTUs | No. of samples (%) | Maximum reads (%) | Mean reads (%) |
|------------------------------|----------------------------|---------------------------|------------------------------|--------------|--------------------|-------------------|----------------|
| <i>Firmicutes</i>            | <i>Clostridia</i>          | <i>Clostridiales</i>      | <i>Ruminococcaceae</i>       | 2306         | 100.00             | 67.95             | 33.71          |
| <i>Firmicutes</i>            | <i>Clostridia</i>          | <i>Clostridiales</i>      | <i>Lachnospiraceae</i>       | 946          | 100.00             | 94.07             | 32.37          |
| <i>Verrucomicrobia</i>       | <i>Verrucomicrobiae</i>    | <i>Verrucomicrobiales</i> | <i>Akkermansiaceae</i>       | 22           | 90.82              | 36.53             | 3.86           |
| <i>Bacteroidetes</i>         | <i>Bacteroidia</i>         | <i>Bacteroidales</i>      | <i>Bacteroidaceae</i>        | 235          | 100.00             | 29.91             | 3.45           |
| <i>Firmicutes</i>            | <i>Clostridia</i>          | <i>Clostridiales</i>      |                              | 367          | 100.00             | 6.72              | 2.78           |
| <i>Firmicutes</i>            | <i>Negativicutes</i>       | <i>Veillonellales</i>     | <i>Veillonellaceae</i>       | 45           | 88.78              | 31.84             | 2.22           |
| <i>Proteobacteria</i>        | <i>Gammaproteobacteria</i> | <i>Enterobacteriales</i>  | <i>Enterobacteriaceae</i>    | 24           | 91.84              | 64.61             | 2.16           |
| <i>Firmicutes</i>            | <i>Clostridia</i>          | <i>Clostridiales</i>      | <i>Christensenellaceae</i>   | 274          | 100.00             | 7.71              | 1.86           |
| <i>Firmicutes</i>            | <i>Clostridia</i>          | <i>Clostridiales</i>      | <i>Clostridiaceae</i>        | 36           | 97.96              | 14.77             | 1.42           |
| <i>Actinobacteria</i>        | <i>Actinobacteria</i>      | <i>Bifidobacteriales</i>  | <i>Bifidobacteriaceae</i>    | 46           | 94.90              | 12.99             | 1.22           |
| <i>Bacteroidetes</i>         | <i>Bacteroidia</i>         | <i>Bacteroidales</i>      | <i>Rikenellaceae</i>         | 91           | 100.00             | 11.80             | 1.16           |
| <i>Bacteroidetes</i>         | <i>Bacteroidia</i>         | <i>Bacteroidales</i>      | <i>Prevotellaceae</i>        | 61           | 70.41              | 30.99             | 1.02           |
| <i>Firmicutes</i>            | <i>Clostridia</i>          | <i>Clostridiales</i>      | <i>Peptostreptococcaceae</i> | 7            | 98.98              | 6.96              | 0.85           |
| <i>Firmicutes</i>            | <i>Erysipelotrichi</i>     | <i>Erysipelotrichales</i> | <i>Erysipelotrichaceae</i>   | 98           | 100.00             | 4.97              | 0.78           |
| <i>Firmicutes</i>            | <i>Bacilli</i>             | <i>Lactobacillales</i>    | <i>Streptococcaceae</i>      | 49           | 100.00             | 12.16             | 0.70           |
| <i>Unclassified Bacteria</i> |                            |                           |                              | 168          | 100.00             | 3.52              | 0.67           |
| <i>Actinobacteria</i>        | <i>Coriobacteriia</i>      | <i>Coriobacteriales</i>   | <i>Coriobacteriaceae</i>     | 124          | 100.00             | 2.94              | 0.58           |
| <i>Firmicutes</i>            |                            |                           |                              | 97           | 100.00             | 3.48              | 0.51           |
| <i>Firmicutes</i>            | <i>Negativicutes</i>       | <i>Acidaminococcales</i>  | <i>Acidaminococcaceae</i>    | 30           | 79.59              | 9.28              | 0.48           |
| <i>Bacteroidetes</i>         | <i>Bacteroidia</i>         | <i>Bacteroidales</i>      | <i>Porphyromonadaceae</i>    | 52           | 97.96              | 3.34              | 0.36           |
| <i>Firmicutes</i>            | <i>Clostridia</i>          | <i>Clostridiales</i>      | <i>Mogibacterium</i>         | 81           | 100.00             | 2.73              | 0.30           |
| <i>Bacteroidetes</i>         | <i>Bacteroidia</i>         | <i>Bacteroidales</i>      | <i>Barnesiellaceae</i>       | 13           | 81.63              | 2.82              | 0.12           |
| <i>Bacteroidetes</i>         | <i>Bacteroidia</i>         | <i>Bacteroidales</i>      | AC160630                     | 8            | 18.37              | 3.34              | 0.10           |
| <i>Proteobacteria</i>        | <i>Deltaproteobacteria</i> | <i>Desulfovibrionales</i> | <i>Desulfovibrionaceae</i>   | 19           | 94.90              | 1.04              | 0.08           |
| <i>Proteobacteria</i>        | <i>Gammaproteobacteria</i> | <i>Enterobacteriales</i>  |                              | 8            | 32.65              | 4.35              | 0.08           |
| <i>Firmicutes</i>            | <i>Bacilli</i>             | <i>Lactobacillales</i>    | <i>Lactobacillaceae</i>      | 18           | 60.20              | 2.42              | 0.08           |
| <i>Bacteroidetes</i>         | <i>Bacteroidia</i>         | <i>Bacteroidales</i>      |                              | 41           | 90.82              | 0.41              | 0.07           |
| <i>Proteobacteria</i>        | <i>Betaproteobacteria</i>  | <i>Burkholderiales</i>    | <i>Sutterellaceae</i>        | 22           | 67.35              | 0.84              | 0.04           |
| <i>Bacteroidetes</i>         | <i>Bacteroidia</i>         | <i>Bacteroidales</i>      | <i>Odoribacteraceae</i>      | 23           | 79.59              | 0.33              | 0.03           |
| <i>Verrucomicrobia</i>       | <i>Verrucomicrobiae</i>    | <i>Verrucomicrobiales</i> |                              | 1            | 58.16              | 0.25              | 0.03           |

|                             |                            |                          |                           |    |       |      |      |
|-----------------------------|----------------------------|--------------------------|---------------------------|----|-------|------|------|
| <i>Verrucomicrobia</i>      |                            |                          |                           | 4  | 44.90 | 0.35 | 0.02 |
| <i>Firmicutes</i>           | <i>Clostridia</i>          | <i>Clostridiales</i>     | <i>Peptococcaceae</i>     | 6  | 38.78 | 0.27 | 0.02 |
| <i>Proteobacteria</i>       |                            |                          |                           | 2  | 36.73 | 0.44 | 0.02 |
| <i>Proteobacteria</i>       | <i>Alphaproteobacteria</i> | <i>Rhodospirillales</i>  | <i>Rhodospirillaceae</i>  | 13 | 46.94 | 0.41 | 0.01 |
| <i>Synergistetes</i>        | <i>Synergistia</i>         | <i>Synergistales</i>     | <i>Synergistaceae</i>     | 3  | 18.37 | 1.12 | 0.01 |
| <i>Actinobacteria</i>       |                            |                          |                           | 17 | 85.71 | 0.16 | 0.01 |
| <i>Firmicutes</i>           | <i>Clostridia</i>          | <i>Clostridiales</i>     | <i>Dehalobacterium</i>    | 9  | 66.33 | 0.04 | 0.01 |
| <i>Tenericutes</i>          | <i>Mollicutes</i>          | <i>PAC001057</i>         | <i>PAC001057</i>          | 9  | 47.96 | 0.19 | 0.01 |
| <i>Actinobacteria</i>       | <i>Actinobacteria</i>      | <i>Actinomycetales</i>   | <i>Actinomycetaceae</i>   | 11 | 79.59 | 0.05 | 0.01 |
| <i>Proteobacteria</i>       | <i>Gammaproteobacteria</i> | <i>Pasteurellales</i>    | <i>Pasteurellaceae</i>    | 7  | 40.82 | 0.11 | 0.01 |
| <i>Bacteroidetes</i>        |                            |                          |                           | 1  | 50.00 | 0.05 | 0.00 |
| <i>Cyanobacteria</i>        | <i>Vampirovibrio</i>       | FR888536                 | FR888536                  | 5  | 27.55 | 0.11 | 0.00 |
| <i>Firmicutes</i>           | <i>Clostridia</i>          | <i>Clostridiales</i>     | <i>Thermincola</i>        | 6  | 33.67 | 0.05 | 0.00 |
| <i>Tenericutes</i>          | <i>Mollicutes</i>          | <i>PAC001057</i>         | <i>PAC000197</i>          | 2  | 19.39 | 0.07 | 0.00 |
| <i>Saccharibacteria_TM7</i> | <i>Saccharimonas</i>       | <i>Saccharimonas</i>     | <i>Saccharimonas</i>      | 4  | 37.76 | 0.02 | 0.00 |
| <i>Firmicutes</i>           | <i>Negativicutes</i>       | <i>Hydrogenispora</i>    | <i>Hydrogenispora</i>     | 4  | 33.67 | 0.01 | 0.00 |
| <i>Proteobacteria</i>       | <i>Betaproteobacteria</i>  | <i>Burkholderiales</i>   | <i>Oxalobacteraceae</i>   | 2  | 16.33 | 0.01 | 0.00 |
| <i>Actinobacteria</i>       | <i>Actinobacteria</i>      |                          |                           | 1  | 13.27 | 0.01 | 0.00 |
| <i>Firmicutes</i>           | <i>Bacilli</i>             | <i>Bacillales</i>        | <i>Gemella</i>            | 1  | 14.29 | 0.01 | 0.00 |
| <i>Tenericutes</i>          | <i>Mollicutes</i>          | <i>Acholeplasmatales</i> | <i>Acholeplasmataceae</i> | 1  | 8.16  | 0.01 | 0.00 |
| <i>Proteobacteria</i>       | <i>Gammaproteobacteria</i> |                          |                           | 1  | 13.27 | 0.01 | 0.00 |

**Supplementary Table S2:** Stability reflected as variance explained ( $R^2$ ) from ANOVA modelling with *individual* as factor for each zOTU. Summary statistics on the level of the top 20 most abundant families. SD, standard deviation.

| Family (#zOTUs within / overall relative abundance) | Average $R^2$ | Min $R^2$ | Max $R^2$ | SD $R^2$ |
|-----------------------------------------------------|---------------|-----------|-----------|----------|
| AC160630 (#8/0.1%)                                  | 86.3          | 78.7      | 92.4      | 3.9      |
| <i>Acidaminococcaceae</i> (#30/0.5%)                | 84.6          | 59.5      | 96.1      | 8.5      |
| <i>Peptostreptococcaceae</i> (#7/0.9%)              | 78.7          | 74.7      | 82.4      | 2.4      |
| <i>Akkermansiaceae</i> (#22/3.4%)                   | 77.9          | 52.5      | 91.2      | 9.2      |
| <i>Prevotellaceae</i> (#61/1.2%)                    | 74.5          | 46.4      | 94.1      | 10.9     |
| <i>Erysipelotrichaceae</i> (#98/0.8%)               | 72.7          | 46.9      | 94.6      | 12.3     |
| <i>Coriobacteriaceae</i> (#124/0.6%)                | 72.6          | 38.7      | 92.9      | 11.8     |
| <i>Mogibacterium</i> (#81/0.3%)                     | 71.0          | 41.9      | 96.6      | 11.2     |
| <i>Rikenellaceae</i> (#91/1.8%)                     | 70.2          | 44.5      | 95.5      | 11.4     |
| <i>Christensenellaceae</i> (#274/2%)                | 69.5          | 39.8      | 94.2      | 12.2     |
| <i>Porphyromonadaceae</i> (#52/0.7%)                | 69.3          | 43.1      | 96.8      | 12.6     |
| <i>Veillonellaceae</i> (#45/1.8%)                   | 69.1          | 42.9      | 92.0      | 11.9     |
| <i>Bifidobacteriaceae</i> (#46/1.2%)                | 68.8          | 36.4      | 89.6      | 13.5     |
| <i>Clostridiaceae</i> (#36/1.5%)                    | 67.8          | 45.2      | 90.4      | 11.1     |
| <i>Barnesiellaceae</i> (#13/0.1%)                   | 67.2          | 44.9      | 82.8      | 10.5     |
| <i>Ruminococcaceae</i> (#2306/35.6%)                | 66.9          | 38.6      | 97.7      | 11.4     |
| <i>Bacteroidaceae</i> (#235/4.7%)                   | 66.5          | 42.0      | 94.2      | 11.0     |
| <i>Enterobacteriaceae</i> (#24/1.8%)                | 66.4          | 48.0      | 93.5      | 9.2      |
| <i>Streptococcaceae</i> (#49/0.7%)                  | 65.7          | 42.8      | 88.0      | 12.0     |
| <i>Lachnospiraceae</i> (#946/35.5%)                 | 65.3          | 35.1      | 94.4      | 10.5     |

**Supplementary Table S3.** Fecal short chain and branched chain fatty acids (SCFA and BCFA) concentrations at baseline and after treatment with placebo HOWARU<sup>®</sup> determined by targeted GC-FID.

| (mmol/kg)            | Placebo, |      |       |           |      |       |      | Probiotic |          |       |      |           |       |      |
|----------------------|----------|------|-------|-----------|------|-------|------|-----------|----------|-------|------|-----------|-------|------|
|                      | Baseline |      |       | Treatment |      |       |      | p-value   | Baseline |       |      | Treatment |       |      |
|                      | Mean     | Min. | Max.  | Mean      | Min. | Max.  |      |           | Mean     | Min.  | Max. | Mean      | Min.  | Max. |
| Acetic acid          | 45.7     | 8.0  | 96.4  | 47.3      | 13.6 | 86.7  | 0.72 | 46.6      | 7.4      | 106.8 | 48.1 | 5.8       | 97.4  | 0.73 |
| Propionic acid       | 12.7     | 1.7  | 42.4  | 13.5      | 2.4  | 29.3  | 0.63 | 13.2      | 3.0      | 35.9  | 13.7 | 1.3       | 32.3  | 0.74 |
| Butyric acid         | 13.6     | 0.7  | 48.0  | 12.6      | 1.3  | 32.3  | 0.65 | 12.7      | 0.5      | 41.6  | 11.6 | 0.5       | 23.4  | 0.48 |
| Valeric acid         | 2.0      | 0    | 8.3   | 12.6      | 0    | 4.8   | 0.69 | 1.7       | 0        | 3.4   | 1.6  | 0         | 3.6   | 0.64 |
| SCFA <sup>1</sup>    | 71.9     | 10.4 | 186.8 | 73.4      | 17.5 | 134.7 | 0.85 | 72.6      | 10.9     | 176.7 | 73.4 | 7.6       | 141.7 | 0.90 |
| Isobutyric acid      | 1.8      | 0.4  | 5.8   | 13.8      | 0.7  | 4.5   | 0.95 | 1.9       | 0.5      | 4.2   | 1.6  | 0.4       | 3.6   | 0.13 |
| 2-methylbutyric acid | 1.4      | 0    | 4.6   | 1.5       | 0.5  | 3.6   | 0.65 | 1.4       | 0.2      | 3.7   | 1.2  | 0.3       | 2.5   | 0.11 |
| Isovaleric acid      | 1.1      | 0    | 3.9   | 1.2       | 0.4  | 3.1   | 0.65 | 1.2       | 0        | 3.1   | 1.0  | 0.3       | 2.3   | 0.14 |
| BCFA <sup>2</sup>    | 4.4      | 0.4  | 14.3  | 4.5       | 1.6  | 137.4 | 0.76 | 4.4       | 0.9      | 10.9  | 3.7  | 1.0       | 8.5   | 0.12 |

<sup>1</sup>Sum of major SCFAs, acetic acid, propionic acid and butyric acid. <sup>2</sup>Sum of BCFAs isobutyric acid, 2-methylbutyric acid and isovaleric acid

<sup>2</sup>q-values (FDR-adjusted p-values)

**Supplementary Table S4.** Relative concentrations (arbitrary units) of faecal metabolites determined by NMR at baseline and after intervention. Metabolites are grouped by their functional classification.

| Metabolic group         | Compound               | Placebo  |       |           |       | Probiotic |       |           |       | q-value <sup>1</sup> |
|-------------------------|------------------------|----------|-------|-----------|-------|-----------|-------|-----------|-------|----------------------|
|                         |                        | Baseline |       | Treatment |       | Baseline  |       | Treatment |       |                      |
|                         |                        | Mean     | SE    | Mean      | SE    | Mean      | SE    | Mean      | SE    |                      |
| Amine metabolism        | Cadavarine             | 0.017    | 0.003 | 0.017     | 0.003 | 0.016     | 0.002 | 0.013     | 0.001 | 0.76                 |
|                         | Putrescine             | 0.015    | 0.002 | 0.016     | 0.003 | 0.014     | 0.002 | 0.015     | 0.003 | 0.90                 |
|                         | Trimethylamine         | 0.002    | 0.000 | 0.003     | 0.001 | 0.004     | 0.001 | 0.002     | 0.001 | 0.24                 |
| Amino acid metabolism   | 3-methyl-2-oxovalerate | 0.024    | 0.003 | 0.034     | 0.004 | 0.027     | 0.004 | 0.027     | 0.003 | 0.24                 |
|                         | Alanine                | 0.258    | 0.033 | 0.308     | 0.047 | 0.332     | 0.047 | 0.280     | 0.042 | 0.24                 |
|                         | Arginine               | 0.029    | 0.006 | 0.029     | 0.006 | 0.041     | 0.010 | 0.025     | 0.004 | 0.40                 |
|                         | Aspartate              | 0.052    | 0.008 | 0.055     | 0.012 | 0.040     | 0.008 | 0.033     | 0.006 | 0.87                 |
|                         | Glutamate              | 0.089    | 0.009 | 0.115     | 0.016 | 0.115     | 0.015 | 0.090     | 0.011 | 0.24                 |
|                         | Glutamine              | 0.032    | 0.005 | 0.039     | 0.007 | 0.040     | 0.006 | 0.029     | 0.004 | 0.24                 |
|                         | Glutarate              | 0.021    | 0.003 | 0.029     | 0.005 | 0.026     | 0.004 | 0.021     | 0.002 | 0.24                 |
|                         | Glycine                | 0.117    | 0.018 | 0.173     | 0.027 | 0.204     | 0.025 | 0.146     | 0.027 | 0.12                 |
|                         | Histidine              | 0.003    | 0.000 | 0.004     | 0.001 | 0.003     | 0.001 | 0.003     | 0.001 | 0.68                 |
|                         | Iso Leucine            | 0.118    | 0.012 | 0.149     | 0.022 | 0.159     | 0.021 | 0.128     | 0.017 | 0.24                 |
|                         | Leucine                | 0.104    | 0.011 | 0.137     | 0.018 | 0.143     | 0.017 | 0.130     | 0.017 | 0.58                 |
|                         | Lysine                 | 0.047    | 0.009 | 0.053     | 0.010 | 0.041     | 0.007 | 0.034     | 0.005 | 0.54                 |
|                         | Methionine             | 0.059    | 0.011 | 0.076     | 0.013 | 0.066     | 0.008 | 0.065     | 0.012 | 0.48                 |
|                         | Ornethine              | 0.113    | 0.016 | 0.131     | 0.015 | 0.136     | 0.025 | 0.119     | 0.019 | 0.48                 |
|                         | Phenylalanine          | 0.071    | 0.012 | 0.083     | 0.015 | 0.080     | 0.010 | 0.070     | 0.011 | 0.54                 |
|                         | Proline                | 0.055    | 0.013 | 0.081     | 0.016 | 0.092     | 0.023 | 0.054     | 0.011 | 0.24                 |
|                         | Threonine              | 0.063    | 0.010 | 0.087     | 0.012 | 0.088     | 0.014 | 0.085     | 0.014 | 0.51                 |
|                         | Tryptophan             | 0.008    | 0.001 | 0.008     | 0.002 | 0.010     | 0.002 | 0.008     | 0.001 | 0.53                 |
|                         | Tyrosine               | 0.082    | 0.011 | 0.092     | 0.013 | 0.110     | 0.017 | 0.098     | 0.014 | 0.42                 |
|                         | Valine                 | 0.110    | 0.012 | 0.129     | 0.021 | 0.144     | 0.020 | 0.111     | 0.016 | 0.28                 |
| Carbohydrate metabolism | Acetoin                | 0.076    | 0.021 | 0.125     | 0.035 | 0.058     | 0.018 | 0.052     | 0.020 | 0.44                 |
|                         | Arabinose              | 0.038    | 0.007 | 0.066     | 0.010 | 0.072     | 0.019 | 0.051     | 0.016 | 0.24                 |

|                   |                          |       |       |       |       |       |       |       |       |      |
|-------------------|--------------------------|-------|-------|-------|-------|-------|-------|-------|-------|------|
| Energy metabolism | Ethanol                  | 0.094 | 0.019 | 0.089 | 0.019 | 0.082 | 0.014 | 0.083 | 0.018 | 0.92 |
|                   | Formate                  | 0.014 | 0.002 | 0.026 | 0.012 | 0.026 | 0.009 | 0.010 | 0.002 | 0.24 |
|                   | Galactose                | 0.039 | 0.009 | 0.052 | 0.012 | 0.028 | 0.006 | 0.030 | 0.006 | 0.54 |
|                   | Glucose                  | 0.017 | 0.003 | 0.029 | 0.007 | 0.018 | 0.004 | 0.014 | 0.003 | 0.24 |
|                   | Glycerol                 | 0.268 | 0.047 | 0.355 | 0.062 | 0.488 | 0.129 | 0.282 | 0.044 | 0.24 |
|                   | Lactate                  | 0.138 | 0.034 | 0.114 | 0.014 | 0.152 | 0.026 | 0.149 | 0.037 | 0.90 |
|                   | Orotic acid              | 0.006 | 0.001 | 0.005 | 0.001 | 0.006 | 0.001 | 0.005 | 0.001 | 0.76 |
|                   | Ribose                   | 0.333 | 0.079 | 0.294 | 0.042 | 0.288 | 0.042 | 0.214 | 0.032 | 0.76 |
|                   | UDP glucose              | 0.004 | 0.001 | 0.003 | 0.001 | 0.003 | 0.001 | 0.003 | 0.001 | 0.76 |
|                   | Xanthine                 | 0.002 | 0.000 | 0.008 | 0.002 | 0.007 | 0.002 | 0.006 | 0.002 | 0.24 |
|                   | Xylose                   | 0.040 | 0.007 | 0.044 | 0.008 | 0.045 | 0.009 | 0.038 | 0.006 | 0.59 |
|                   | Acetic acid              | 2.865 | 0.248 | 3.065 | 0.323 | 2.848 | 0.202 | 2.790 | 0.258 | 0.78 |
|                   | Fumaric acid             | 0.065 | 0.011 | 0.081 | 0.011 | 0.057 | 0.007 | 0.049 | 0.007 | 0.32 |
|                   | Malic acid               | 0.060 | 0.008 | 0.073 | 0.014 | 0.059 | 0.008 | 0.060 | 0.010 | 0.77 |
|                   | Butyric acid             | 0.351 | 0.040 | 0.409 | 0.037 | 0.38  | 0.028 | 0.353 | 0.035 | 0.76 |
|                   | Propionic acid           | 0.731 | 0.082 | 1.059 | 0.151 | 1.068 | 0.108 | 0.792 | 0.085 | 0.83 |
|                   | Succinic acid            | 0.026 | 0.003 | 0.036 | 0.007 | 0.032 | 0.009 | 0.041 | 0.012 | 0.86 |
|                   | Valeric acid             | 0.819 | 0.094 | 0.862 | 0.097 | 0.904 | 0.087 | 0.861 | 0.099 | 0.92 |
| Other             | Glycerophosphorylcholine | 0.008 | 0.002 | 0.010 | 0.002 | 0.012 | 0.004 | 0.006 | 0.001 | 0.24 |
|                   | Nicotinate               | 0.024 | 0.003 | 0.029 | 0.004 | 0.032 | 0.004 | 0.026 | 0.003 | 0.24 |
| Phenol metabolism | P-cresol                 | 0.025 | 0.004 | 0.027 | 0.004 | 0.026 | 0.004 | 0.029 | 0.004 | 0.68 |

<sup>1</sup> q-values (FDR-adjusted p-values)

Supplementary Figure S1A

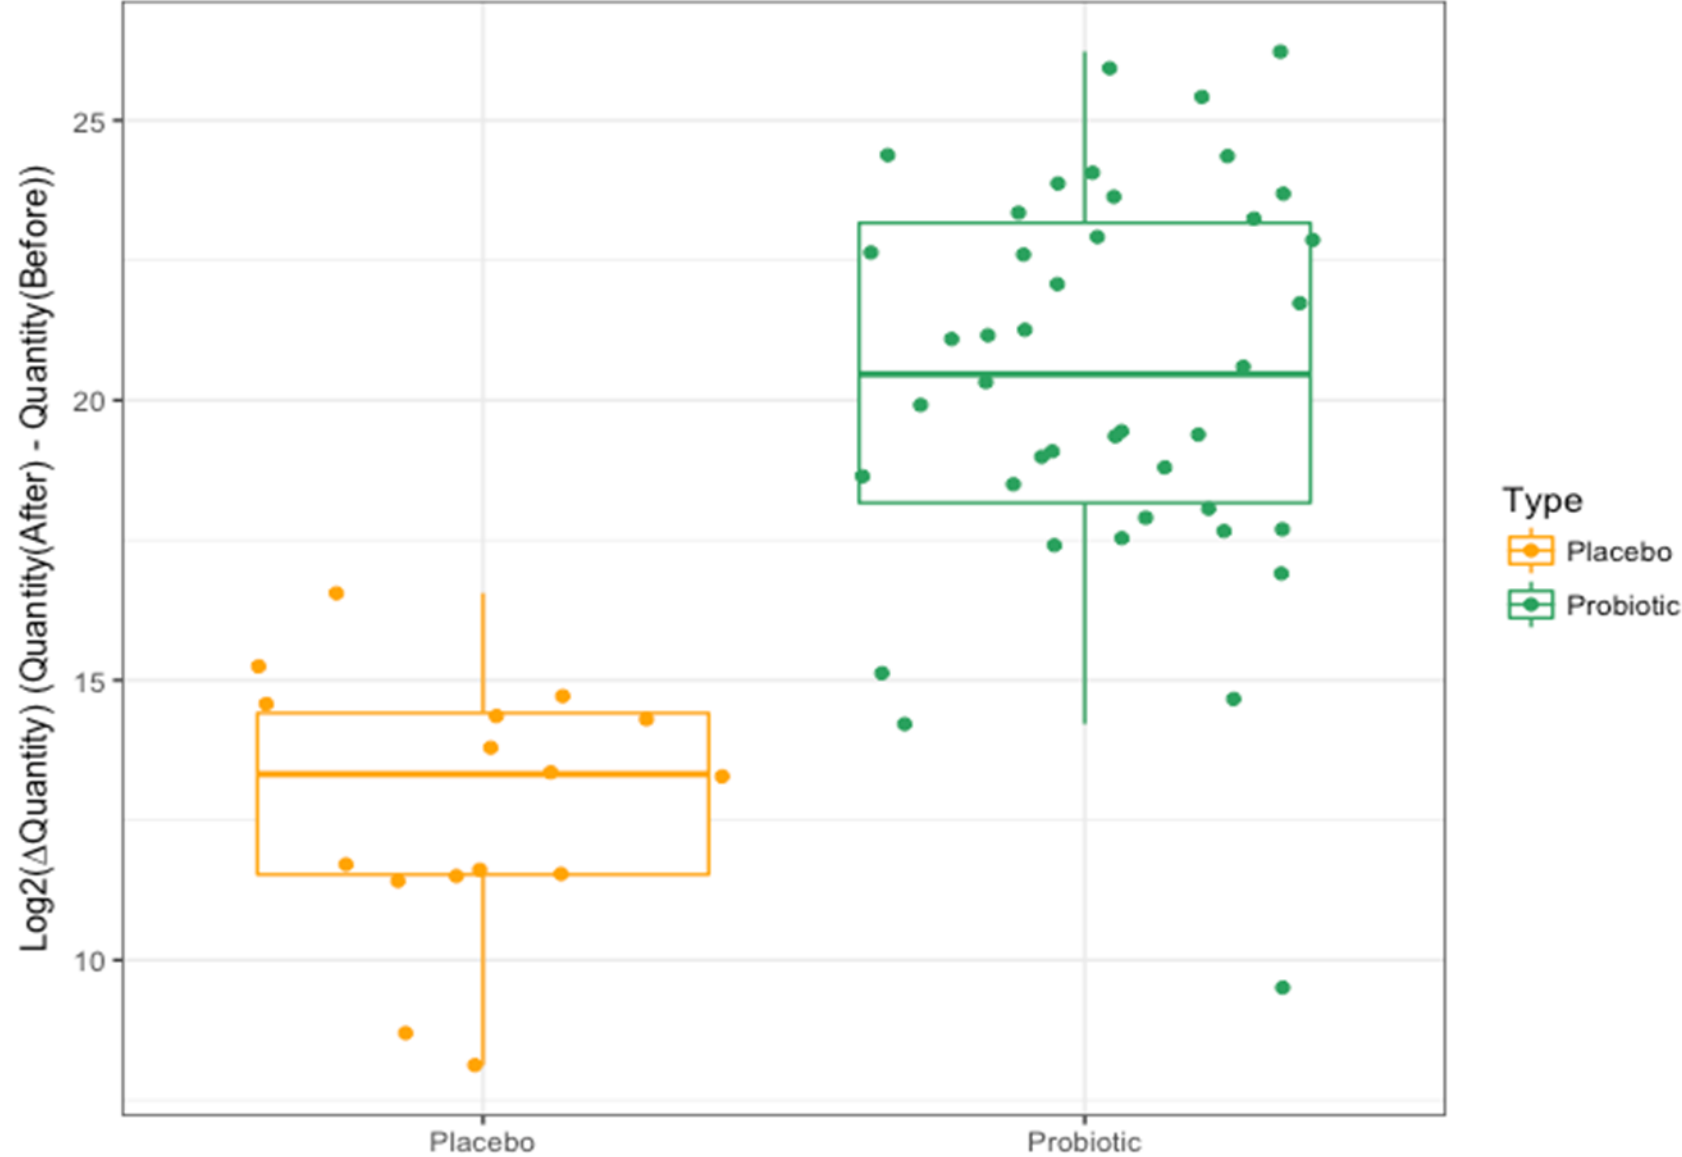

Supplementary Figure S1B

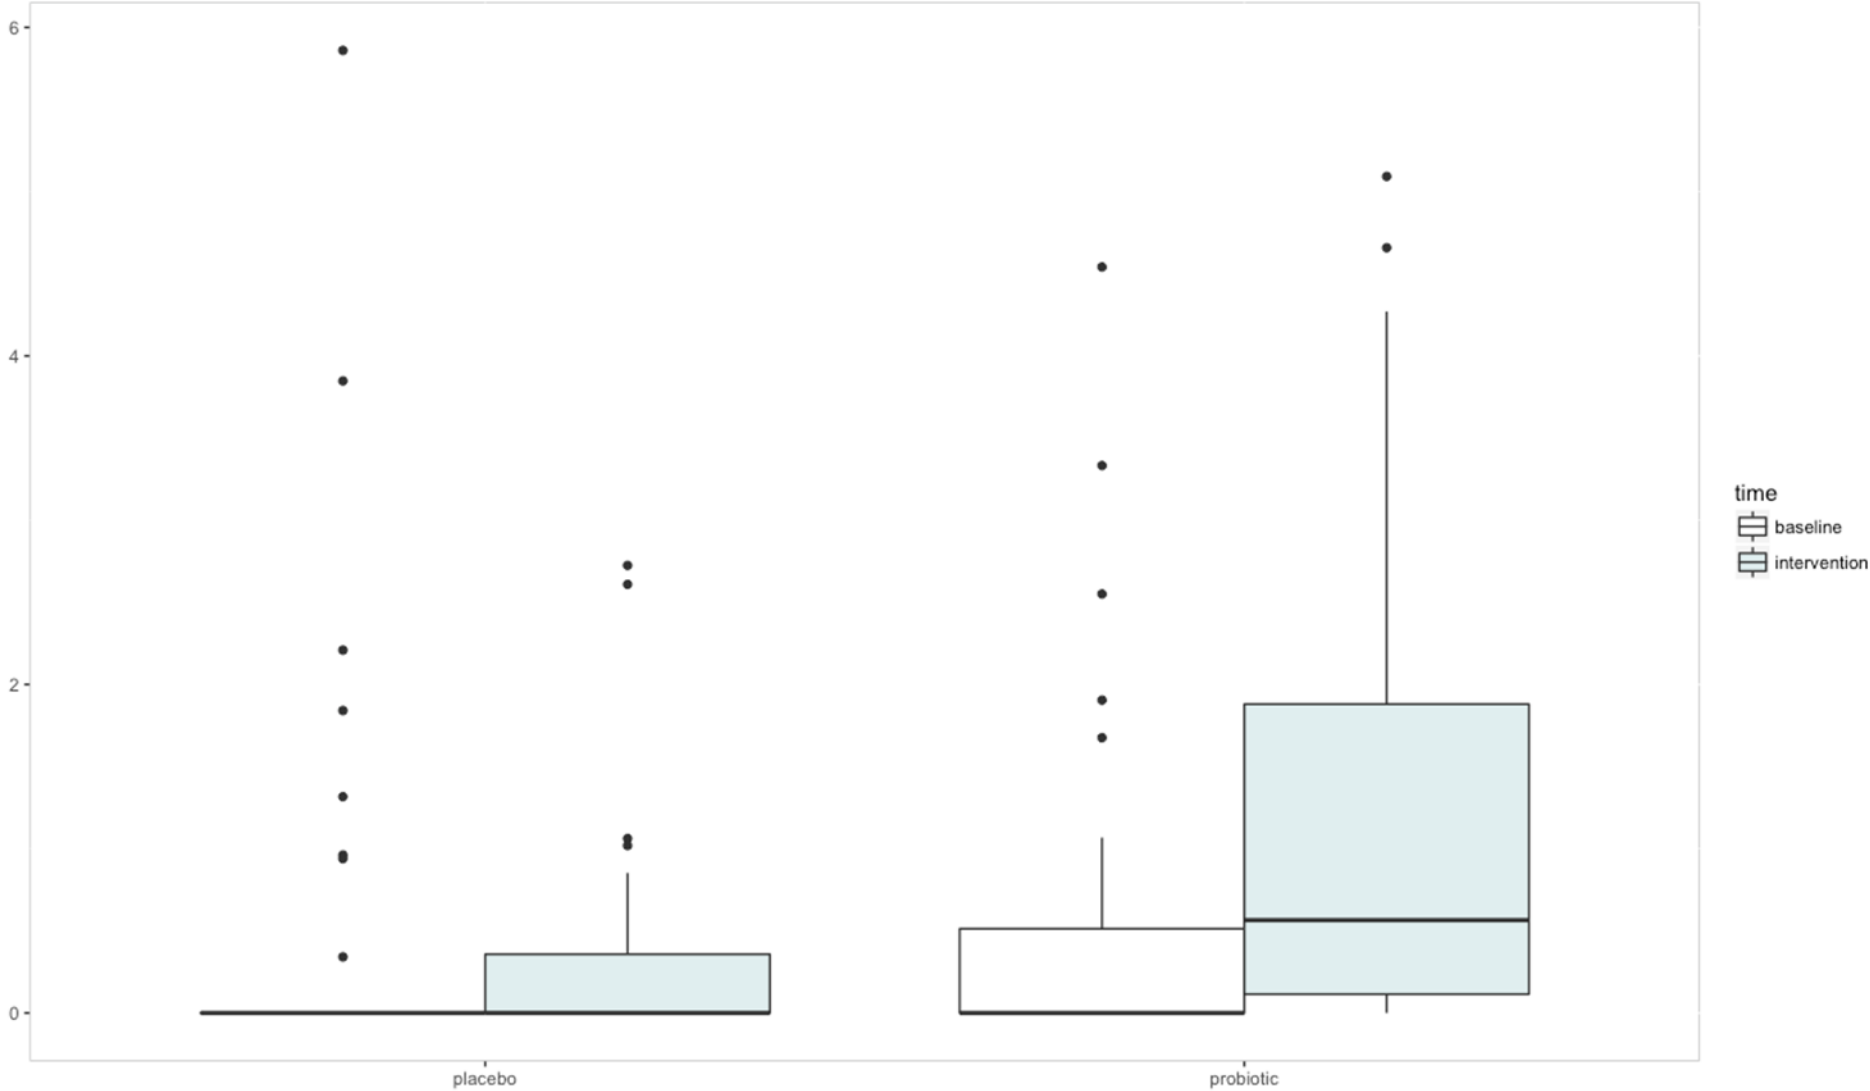



Supplementary Figure S2

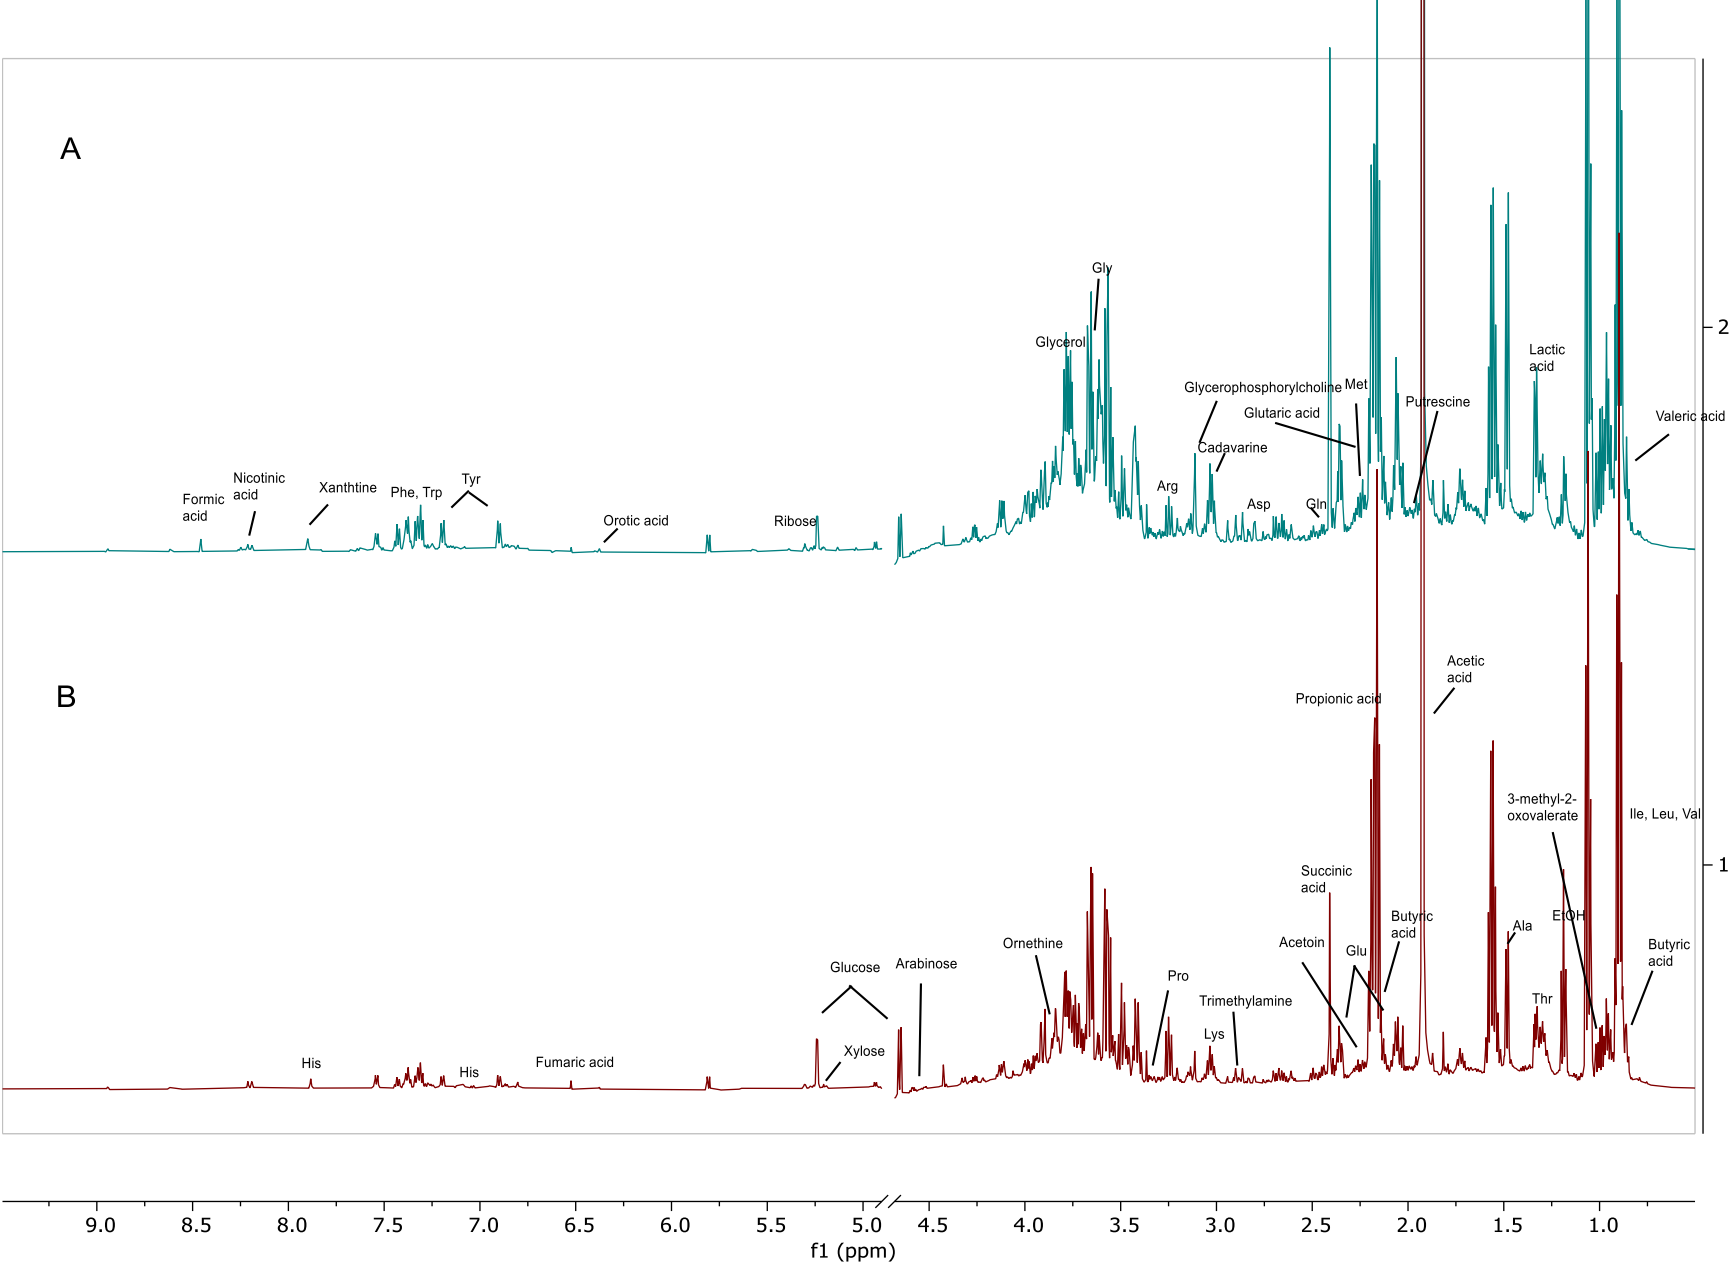

Supplement: s1 [file s1]
